# Supplementary material for: Mutations Related to Antibiotics Resistance in Helicobacter pylori Clinical Isolates from Bangladesh
Source: MDPI journal article supplement (doi:10.3390/antibiotics12020279), 2023-01-31
Supplement: s1 [file s1]

Supplementary Table S1. The distribution of the mutation in *gyrA* among hpAsia2 and hpEurope

| Mutations | Resistant |          |       | Susceptible |          |       | Grand Total |
|-----------|-----------|----------|-------|-------------|----------|-------|-------------|
|           | hpAsia2   | hpEurope | Total | hpAsia2     | hpEurope | Total |             |
| N87K      | 5         | 8        | 13    | 0           | 0        | 0     | 13          |
| N87Y      | 1         |          | 1     | 0           | 0        | 0     | 1           |
| D91G      | 3         | 2        | 5     | 0           | 0        | 0     | 5           |
| D91N      | 3         | 10       | 13    | 0           | 0        | 0     | 13          |
| D91Y      | 1         |          | 1     | 0           | 0        | 0     | 1           |
| Total     | 13        | 20       | 33    | 0           | 0        | 0     |             |

Supplementary Table S2. Frameshift mutations occurred in the *rdxA*, *mdaB*, *ribF* and *frxA*

| Framehift locus    | Resistant |         | Susceptible |         | Grand Total |
|--------------------|-----------|---------|-------------|---------|-------------|
|                    | Absent    | Present | Absent      | Present |             |
| <i>rdxA.H97fs</i>  | 46        | 7       | 3           |         | 56          |
| <i>rdxA.I160fs</i> | 52        | 1       | 3           |         | 56          |
| <i>rdxA.K64fs</i>  | 52        | 1       | 3           |         | 56          |
| <i>rdxA.K78fs</i>  | 52        | 1       | 3           |         | 56          |
| <i>rdxA.K8fs</i>   | 52        | 1       | 3           |         | 56          |
| <i>rdxA.M84fs</i>  | 51        | 2       | 3           |         | 56          |
| <i>rdxA.P96fs</i>  | 20        | 33      | 2           | 1       | 56          |
| <i>rdxA.R41fs</i>  | 52        | 1       | 3           |         | 56          |
| <i>mdaB.A51fs</i>  | 36        | 17      | 2           | 1       | 56          |
| <i>mdaB.E55fs</i>  | 38        | 15      | 3           |         | 56          |
| <i>mdaB.G159fs</i> | 52        | 1       | 3           |         | 56          |
| <i>mdaB.H50fs</i>  | 15        | 38      | 1           | 2       | 56          |
| <i>mdaB.P68fs</i>  | 53        |         | 2           | 1       | 56          |
| <i>mdaB.S87fs</i>  | 47        | 6       | 3           |         | 56          |
| <i>mdaB.V171fs</i> | 52        | 1       | 3           |         | 56          |
| <i>mdaB.V44fs</i>  | 52        | 1       | 3           |         | 56          |
| <i>mdaB.V57fs</i>  | 39        | 14      | 3           |         | 56          |
| <i>ribF.R256fs</i> | 52        | 1       | 3           |         | 56          |
| <i>ribF.S258fs</i> | 52        | 1       | 3           |         | 56          |
| <i>frxA.A16fs</i>  | 51        | 2       | 3           |         | 56          |
| <i>frxA.D109fs</i> | 52        | 1       | 3           |         | 56          |
| <i>frxA.D136fs</i> | 52        | 1       | 3           |         | 56          |
| <i>frxA.D94fs</i>  | 51        | 2       | 3           |         | 56          |
| <i>frxA.G69fs</i>  | 51        | 2       | 3           |         | 56          |
| <i>frxA.K105fs</i> | 52        | 1       | 3           |         | 56          |
| <i>frxA.K18fs</i>  | 45        | 8       | 2           | 1       | 56          |
| <i>frxA.K204fs</i> | 52        | 1       | 3           |         | 56          |
| <i>frxA.K97fs</i>  | 52        | 1       | 3           |         | 56          |
| <i>frxA.M66fs</i>  | 52        | 1       | 3           |         | 56          |
| <i>frxA.Q10fs</i>  | 52        | 1       | 3           |         | 56          |
| <i>frxA.S189fs</i> | 53        |         | 2           | 1       | 56          |
| <i>frxA.V36fs</i>  | 52        | 1       | 3           |         | 56          |
| <i>frxA.W68fs</i>  | 51        | 2       | 3           |         | 56          |
| Grand Total        | 1583      | 166     | 92          | 7       | 1848        |

Supplementary Table S3. Physical and chemical parameters of the fur and ribF protein

| <b>Protein</b> | <b>Theoretical pI</b> | <b>Estimated half-life (mammalian reticulocytes, in vitro; yeast, in vivo; Escherichia coli, in vivo)</b> | <b>Instability index</b> | <b>Aliphatic index</b> | <b>Grand average of hydropathicity (GRAVY)</b> |
|----------------|-----------------------|-----------------------------------------------------------------------------------------------------------|--------------------------|------------------------|------------------------------------------------|
| fur_WT         | 8.50                  | 30hr; >20hr; >10hr                                                                                        | 54.19                    | 85.73                  | -0.631                                         |
| fur_N118Q      | 8.50                  | 30hr; >20hr; >10hr                                                                                        | 55.47                    | 85.73                  | -0.631                                         |
| ribF_WT        | 9.33                  | 5.5h; 3min; 2min                                                                                          | 36.25                    | 111.11                 | -0.148                                         |
| ribF_D253E     | 9.33                  | 5.5h; 3min; 2min                                                                                          | 36.25                    | 111.11                 | -0.148                                         |
| ribF_S151L     | 9.33                  | 5.5h; 3min; 2min                                                                                          | 36.25                    | 112.51                 | -0.131                                         |

**Analyses** **Residue: GLN 118**

Bad  
Allowed  
Good

Largest pocket  
Pocket

JSmol

Take Jmol snapshot Show All analyses Hide All analyses Clear Selection Hover over a residue below to see info. Click to spacefill.

Predicted Secondary structure  
SS Confidence  
Model Secondary structure  
Query Sequence  
Modelled Residues  
Clashes  
Conservation  
Disorder  
Alignment confidence  
Pocket detection  
ProQ2 quality assessment  
ProteinDB Interface  
Ramachandran analysis  
Rotamers  
Mutational sensitivity

**Analyses** **Residue: GLU 253**

Bad  
Allowed  
Good

Largest pocket  
Pocket

JSmol

Take Jmol snapshot Show All analyses Hide All analyses Clear Selection Hover over a residue below to see info. Click to spacefill.

Predicted Secondary structure  
SS Confidence  
Model Secondary structure  
Query Sequence  
Modelled Residues  
Clashes  
Conservation  
Disorder  
Alignment confidence  
PE-Site Interface  
Pocket detection  
ProQ2 quality assessment  
ProteinDB Interface  
Ramachandran analysis  
Rotamers  
Mutational sensitivity

**B.**

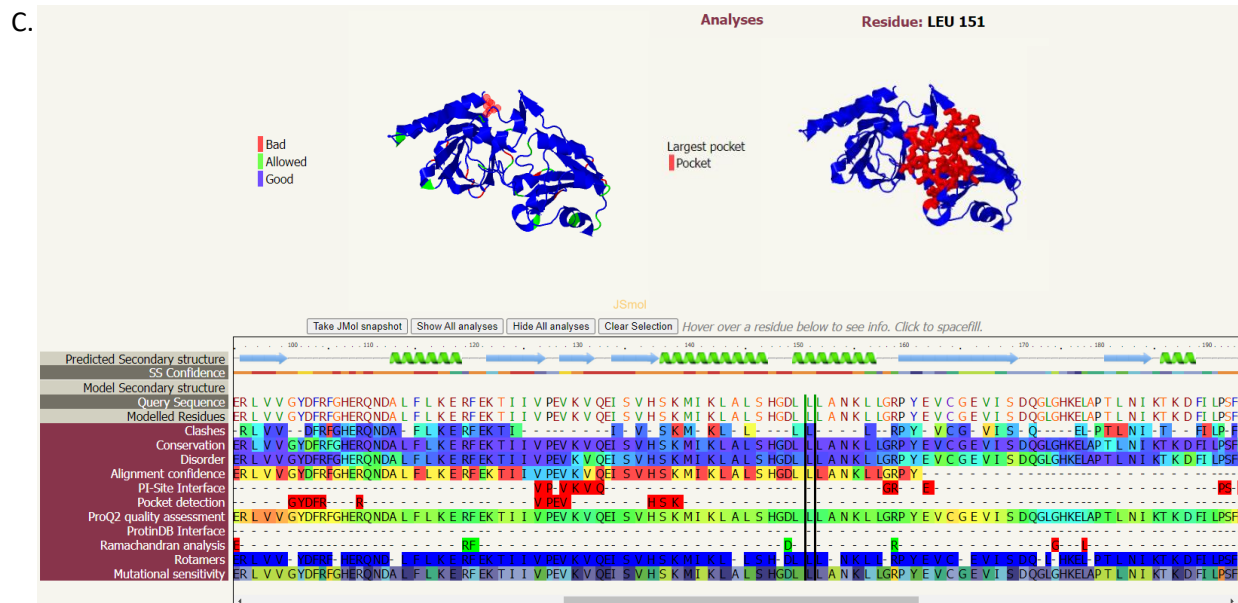

**Supplementary Figure S1.** A. In-depth analysis on fur\_N118Q amino acid. B. In-depth analysis on ribF\_D253E amino acid. C. In-depth analysis on ribF\_S151L amino acid. *Red arrow*: represents the location of mutation. *Left structure*: the colour represent the Ramachandran analysis results. *Right structure*: the red mark showed the pocket that possibly become the protein active site. *Bottom table*: informed the secondary structure and other protein analysis results.
